# Differential Immediate and Sustained Memory Enhancing Effects of Alpha7 Nicotinic Receptor Agonists and Allosteric Modulators in Rats

Morten S. Thomsen<sup>1\*</sup>, Mona El-Sayed<sup>1</sup>, Jens D. Mikkelsen<sup>1,2</sup>

<sup>1</sup> Neurobiology Research Unit, University Hospital Copenhagen, Copenhagen, Denmark, <sup>2</sup> Neurosearch A/S, Ballerup, Denmark

## Abstract

The  $\alpha 7$  nicotinic acetylcholine receptor (nAChR) is a potential target for the treatment of cognitive deficits in patients with schizophrenia, ADHD and Alzheimer's disease. Here we test the hypothesis that upregulation of  $\alpha 7$  nAChR levels underlies the enhanced and sustained procognitive effect of repeated administration of  $\alpha 7$  nAChR agonists. We further compare the effect of agonists to that of  $\alpha 7$  nAChR positive allosteric modulators (PAMs), which do not induce upregulation of the  $\alpha 7$  nAChR. Using the social discrimination test as a measure of short-term memory, we show that the  $\alpha 7$  nAChR agonist A-582941 improves short-term memory immediately after repeated ( $7 \times$  daily), but not a single administration. The  $\alpha 7$  nAChR PAMs PNU-120596 and AVL-3288 do not affect short-term memory immediately after a single or repeated administration. This demonstrates a fundamental difference in the behavioral effects of agonists and PAMs that may be relevant for clinical development. Importantly, A-582941 and AVL-3288 increase short-term memory 24 hrs after repeated, but not a single, administration, suggesting that repeated administration of both agonists and PAMs may produce sustained effects on cognitive performance. Subsequent [<sup>125</sup>I]-bungarotoxin autoradiography revealed no direct correlation between  $\alpha 7$  nAChR levels in frontal cortical or hippocampal brain regions and short-term memory with either compound. Additionally, repeated treatment with A-582941 did not affect mRNA expression of RIC-3 or the lynx-like gene products lynx1, lynx2, PSCA, or Ly6H, which are known to affect nAChR function. In conclusion, both  $\alpha 7$  nAChR agonists and PAMs exhibit sustained pro-cognitive effects after repeated administration, and altered levels of the  $\alpha 7$  nAChR *per se*, or that of endogenous regulators of nAChR function, are likely not the major cause of this effect.

**Citation:** Thomsen MS, El-Sayed M, Mikkelsen JD (2011) Differential Immediate and Sustained Memory Enhancing Effects of Alpha7 Nicotinic Receptor Agonists and Allosteric Modulators in Rats. PLoS ONE 6(11): e27014. doi:10.1371/journal.pone.0027014

**Editor:** Kuei-Sen Hsu, College of Medicine, National Cheng Kung University, Taiwan

**Received:** August 4, 2011; **Accepted:** October 7, 2011; **Published:** November 9, 2011

**Copyright:** © 2011 Thomsen et al. This is an open-access article distributed under the terms of the Creative Commons Attribution License, which permits unrestricted use, distribution, and reproduction in any medium, provided the original author and source are credited.

**Funding:** This work was supported by the Danish Medical Research Council, the NOVO Nordisk Foundation, the Lundbeck Foundation, and the Danish Ministry of Science, Technology and Innovation. The funders had no role in study design, data collection and analysis, decision to publish, or preparation of the manuscript.

**Competing Interests:** The authors have declared that no competing interests exist.

\* E-mail: morten.s.thomsen@nru.dk

## Introduction

Agonists and positive allosteric modulators (PAMs) of the  $\alpha 7$  nicotinic acetylcholine receptor (nAChR) are currently being developed to ameliorate cognitive deficits in diseases such as schizophrenia, ADHD and Alzheimer's disease [1,2].

The  $\alpha 7$  nAChR desensitizes rapidly in response to high agonist concentrations *in vitro* [3,4], which initially led to concern regarding its applicability as a clinical drug target [5,6]. However, there does not seem to be development of tolerance regarding the procognitive effects of  $\alpha 7$  nAChR agonists in animal models (reviewed in [7]). Thus, repeated  $\alpha 7$  nAChR agonist administration has been shown to improve auditory gating, Morris water maze learning, classical eyeblink conditioning, inhibitory avoidance and novel object recognition [8–13]. Importantly, repeated, but not acute, administration of the  $\alpha 7$  nAChR agonist TC-5619 improves performance in the novel object recognition test [14], indicating an enhanced effect with repeated administration in this test. Furthermore, it has been shown that agonists of nAChRs can produce long-lasting cognitive effects that outlast the presence of the compounds in the body [15,16]. Furthermore, [<sup>3</sup>H]-nicotine binding sites correlate with performance in the Morris water maze task several days after

nicotine administration [17], suggesting that the prolonged effects were mediated by an increased number of nAChRs. Specifically for the  $\alpha 7$  nAChR, it has been shown that the  $\alpha 7$  nAChR agonist, AZD0328 enhances novel object recognition and increases [<sup>125</sup>I]-bungarotoxin (BTX) binding in mice 4–48 hours after administration [18]. In a related study AZD0328 enhanced performance in a delayed response task in monkeys with effects evident more than one month after administration of the compound [19]. Taken together, these studies suggest that increased receptor numbers may underlie the sustained cognitive effects of nAChR agonists, although a direct correlation between  $\alpha 7$  nAChR levels and cognitive performance has not been investigated.

PAMs of the  $\alpha 7$  nAChR increase the response to an agonist and are divided into two types depending on whether they also decrease desensitization of the receptor (type II) or not (type I) [20]. Compared to agonists, there is much less data regarding the cognitive effects of  $\alpha 7$  nAChR PAMs in animals, and no published clinical data. However, documented effects include improvements of pre-pulse inhibition and auditory gating as well as short- and long-term memory [21–25], resembling the behavioral effects of the agonists. Since PAMs do not activate the receptor *per se*, but modulate the effects of endogenous transmitters, they may enable

more subtle regulation of  $\alpha 7$  nAChR responses compared to agonists [2], but on the other hand, a lack of activation by the PAMs alone may hamper their effectiveness in patients with decreased levels of endogenous activation. It is thus not clear whether agonists or PAMs are preferable for clinical use, or whether there are qualitative differences between these types of compounds *in vivo* in terms of repeated administration.

We have recently demonstrated a fundamental *in vivo* difference between agonists and PAMs in that acute or repeated administration of the former, but not the latter, increases [ $^{125}$ I]-BTX binding sites in the rat brain, reflecting an increased number of  $\alpha 7$  nAChRs [26]. Given that upregulation of the  $\alpha 7$  nAChR might underlie the enhanced procognitive effect seen with repeated administration of  $\alpha 7$  nAChR agonists, as well as the long-lasting cognitive effects of these compounds, it is pertinent to examine whether  $\alpha 7$  nAChR PAMs exhibit similar properties, since they do not induce upregulation of the receptor.

Here we use a rat social discrimination test to examine whether the  $\alpha 7$  nAChR agonist A-582941 or the  $\alpha 7$  nAChR PAMs, AVL-3288 (type I) or PNU-120596 (type II), has procognitive effects after acute or repeated administration, respectively, and whether such effects are long-lasting. In addition, we relate the behavioral effect of the compounds to their effect on  $\alpha 7$  nAChR binding sites in the brain as well as activation of intracellular signalling cascades.

## Results

### A-582941 and AVL-3288 enhance performance in the social discrimination test

Rats were injected subcutaneously (s.c.) with 10 mg/kg A-582941, 1 mg/kg AVL-3288, 3 mg/kg PNU-120596, or vehicle once daily for seven days. They were tested in the social

discrimination test 4 times: on the day of the first injection; 24 hours after the first injection, but before the second injection; on the day of the seventh injection; and 24 hours after the last injection (Fig. 1A).

A single injection of either A-582941, AVL-3288, or PNU-120596 did not affect the preference of rats for a novel versus familiar juvenile, neither immediately (after a 2 hour intertrial interval) nor 24 hours after administration (Fig. 1B and C). However, when tested immediately after the last of seven daily injections, A-582941-treated rats exhibited a significantly enhanced preference index compared to vehicle-treated rats (Fig. 1D,  $P < 0.05$ ), whereas AVL-3288 and PNU-120596 had no effect. When tested 24 hours after the last administration, A-582941-treated rats still exhibited a significantly enhanced preference index (Fig. 1E,  $P < 0.01$ ). At this time point, AVL-3288-treated animals also has a significantly increased preference index ( $P < 0.05$ ), whereas there was no effect of PNU-120596.

The exploration time during the first trial of each test was analyzed, and there was no significant difference between groups in terms of exploration of the familiar stimulus rat (data not shown). Also, the total exploration time, i.e. the time spent exploring the familiar and novel stimulus rat, during the second trial did not significantly differ between groups in any of the tests.

### No correlation between performance in the social discrimination test and brain [ $^{125}$ I]-bungarotoxin binding

After the final social discrimination test, rats were decapitated, and [ $^{125}$ I]-BTX autoradiography was performed on coronal brain sections from the frontal cortex and hippocampus.

A-582941-treated animals had significantly increased [ $^{125}$ I]-BTX binding in the outer and inner layers of the medial prefrontal cortex

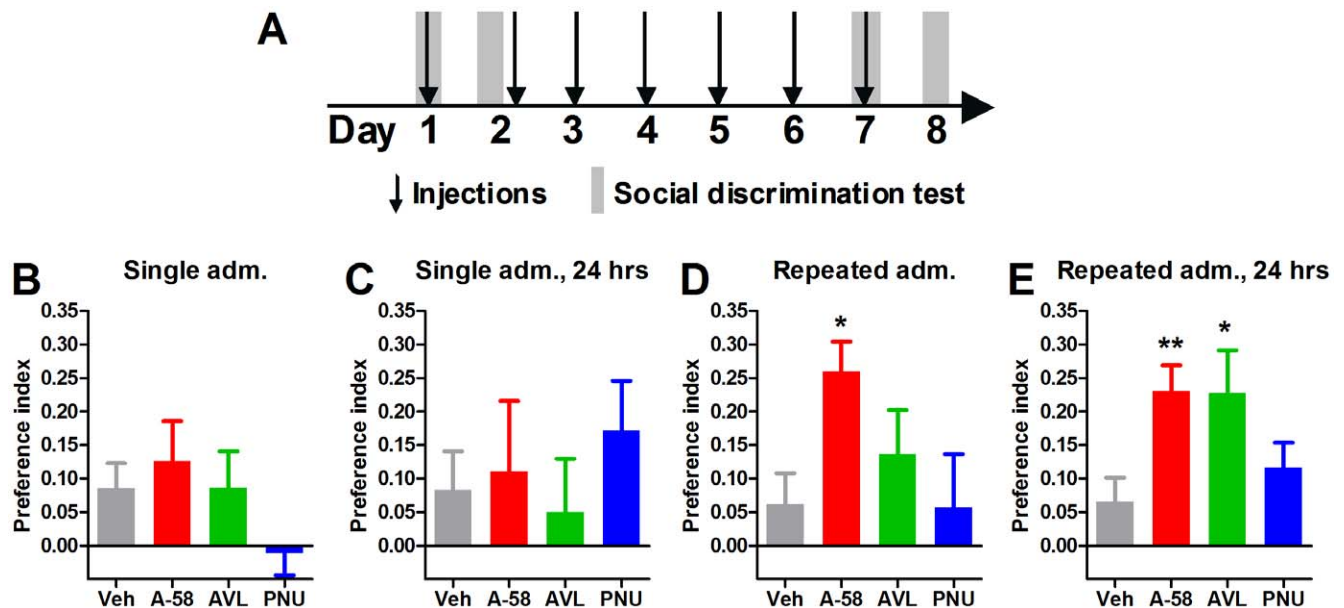

**Figure 1. Effect of acute and repeated administration of  $\alpha 7$  nAChR ligands in the social discrimination test.** Rats were injected with A-582941 (A-58, 10 mg/kg), AVL-3288 (AVL, 1 mg/kg), PNU-120596 (PNU, 3 mg/kg), or vehicle (Veh, 5% DMSO, 8% Solutol in saline) once daily for seven days. (A) Diagram of the schedule for injections and behavioral testing. The rats were tested in the social discrimination test (B) on the day of the first injection ( $n = 13-20$ ), (C) 24 hours after the first injection, but before the second injection ( $n = 10-14$ ), (D) on the day of the seventh injection ( $n = 9-18$ ), and (E) 24 hours after the last injection ( $n = 10-24$ ). Neither compound affected social discrimination after a single injection. However, daily injection of A-58 for 7 days significantly increased the preference for exploring the novel juvenile compared to the familiar one, indicating an increase in short-term memory. Importantly, this effect was still detectable 24 hours after the last injection. At this time point, AVL also produced a significant increase in the preferatory index. \*  $P < 0.05$  and \*\*  $P < 0.01$  indicate significant difference from vehicle in a one-way ANOVA with Dunnett's multiple comparison test. Error bars indicate the standard error of the mean. doi:10.1371/journal.pone.0027014.g001

(mPFC), the ventrolateral orbitofrontal cortex (VLO), and the CA2/3 region of the hippocampus compared with vehicle-treated rats, whereas they did not differ from controls in the CA1 or dentate gyrus (DG) regions of the hippocampus (Fig. 2). PNU-120596 significantly increased [<sup>125</sup>I]-BTX binding in the CA1, whereas AVL-3288 did not affect binding in any region measured.

In an attempt to see whether there was a connection between  $\alpha 7$  nAChR levels and cognitive performance, we correlated the performance of rats in the social discrimination test 24 hours after the last of seven drug administrations with brain [<sup>125</sup>I]-BTX binding. Neither A-582941-, PNU-120596-, AVL-3288- nor vehicle-treated rats displayed any significant correlations between performance in the social discrimination index and [<sup>125</sup>I]-BTX binding in any region measured (Fig. 3).

#### PNU-120596 and AVL-3288 do not affect A-582941-induced immediate-early gene expression in the frontal cortex

Juvenile rats were injected s.c. with 3 mg/kg PNU-120596, 1 mg/kg AVL-3288, or vehicle once daily for 7 days (pretreatment). 4 hours after the last injection, the animals received an acute challenge of 10 mg/kg A-582941 or vehicle and were decapitated 1 hour later (Fig. 4A). Radioactive *in situ* hybridization was performed for the immediate-early genes (IEGs) activity-regulated cytoskeleton-associated protein (*arc*) and *c-Fos*, on coronal brain sections from the frontal cortex.

A two-way ANOVA on Arc mRNA expression with pre-treatment and acute treatment as the fixed factors showed a

significant main effect of acute administration of A-582941 in the mPFC and VLO ( $P < 0.0001$ ), but no main effect of the pre-treatment ( $P = 0.87$  and  $P = 0.21$ , respectively) and no interaction between the effects of pre-treatment and acute treatment ( $P = 0.18$  and  $P = 0.43$ , respectively, Fig. 4B). Subsequent Bonferroni-corrected t-tests showed that acute administration of A-582941 significantly increased Arc mRNA in the mPFC in vehicle-, PNU-120596-, and AVL-3288-pretreated rats, whereas the compound only increased Arc mRNA in the VLO in vehicle- and PNU-120596-pretreated rats.

A similar picture emerged for c-Fos mRNA, although the degree of induction with A-582941 was smaller overall (Fig. 4C). Thus, a two-way ANOVA on c-Fos mRNA expression showed a significant main effect of acute administration of A-582941 in the mPFC and VLO ( $P < 0.0001$  and  $P = 0.0006$ , respectively), but no main effect of the pre-treatment ( $P = 0.40$  and  $P = 0.08$ , respectively) and no interaction ( $P = 0.13$  and  $P = 0.12$ , respectively). Subsequent Bonferroni-corrected t-tests showed that acute administration of A-582941 significantly increased c-Fos mRNA in the mPFC in PNU120596- and AVL-3288-pretreated rats, and increased c-Fos mRNA in the VLO in PNU-120596-pretreated rats.

#### Repeated A-582941 administration does not affect mRNA levels of endogenous regulators of $\alpha 7$ nAChR expression and function in the frontal cortex or hippocampus

Juvenile rats were administered 10 mg/kg A-582941 or vehicle s.c. once daily for 7 days and were decapitated 1, 4, 10, 24, 72 or

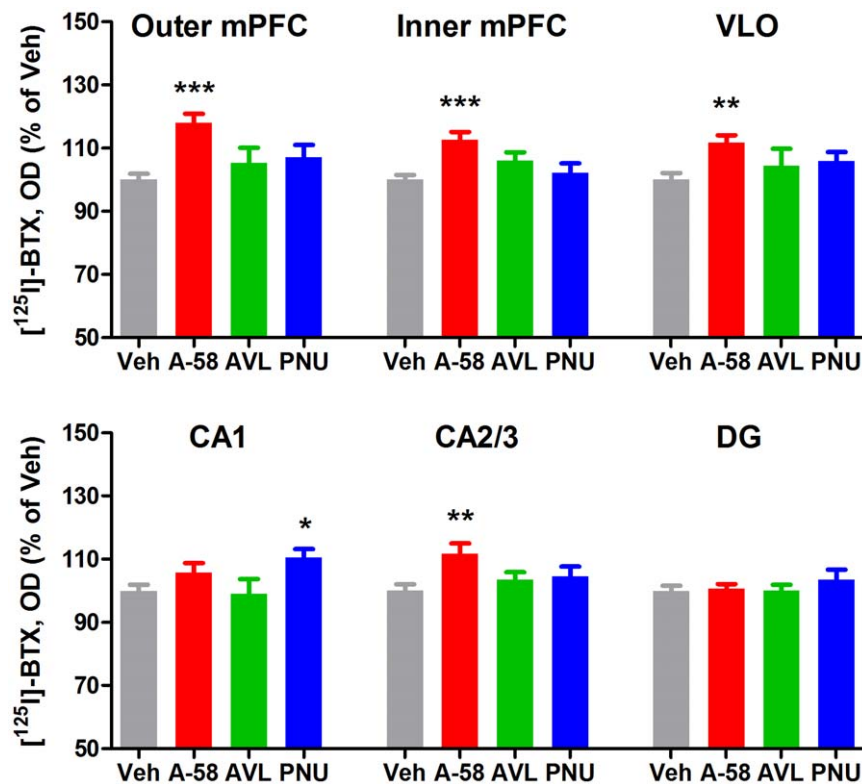

**Figure 2. Brain [<sup>125</sup>I]-bungarotoxin binding in rats tested in the social discrimination test.** Rats that underwent the injection and testing scheme described in Fig. 1 were decapitated immediately after the last social discrimination test. [<sup>125</sup>I]-bungarotoxin (BTX) binding was analyzed using optical density (OD) in the outer (I–IV) and inner (V–VI) layers of the medial prefrontal cortex (mPFC), the ventrolateral orbitofrontal cortex (VLO) as well as the CA1, CA2/3 and dentate gyrus (DG) regions of the hippocampus. A-582941 (A-58, n = 27)-treated rats had significantly increased [<sup>125</sup>I]-BTX binding in the outer and inner layers of the mPFC, the VLO and the CA2/3, compared with vehicle-treated rats (Veh, n = 26). PNU-120596 (PNU, n = 20) increased [<sup>125</sup>I]-BTX binding in the CA1, and AVL-3288 (AVL, n = 8) did not affect [<sup>125</sup>I]-BTX binding in any region measured. \*  $P < 0.05$ , \*\*  $P < 0.01$ , and \*\*\*  $P < 0.001$  indicate significant difference from vehicle-treated rats in a one-way ANOVA with Dunnett's multiple comparison test performed separately for each region. Error bars indicate the standard error of the mean. doi:10.1371/journal.pone.0027014.g002

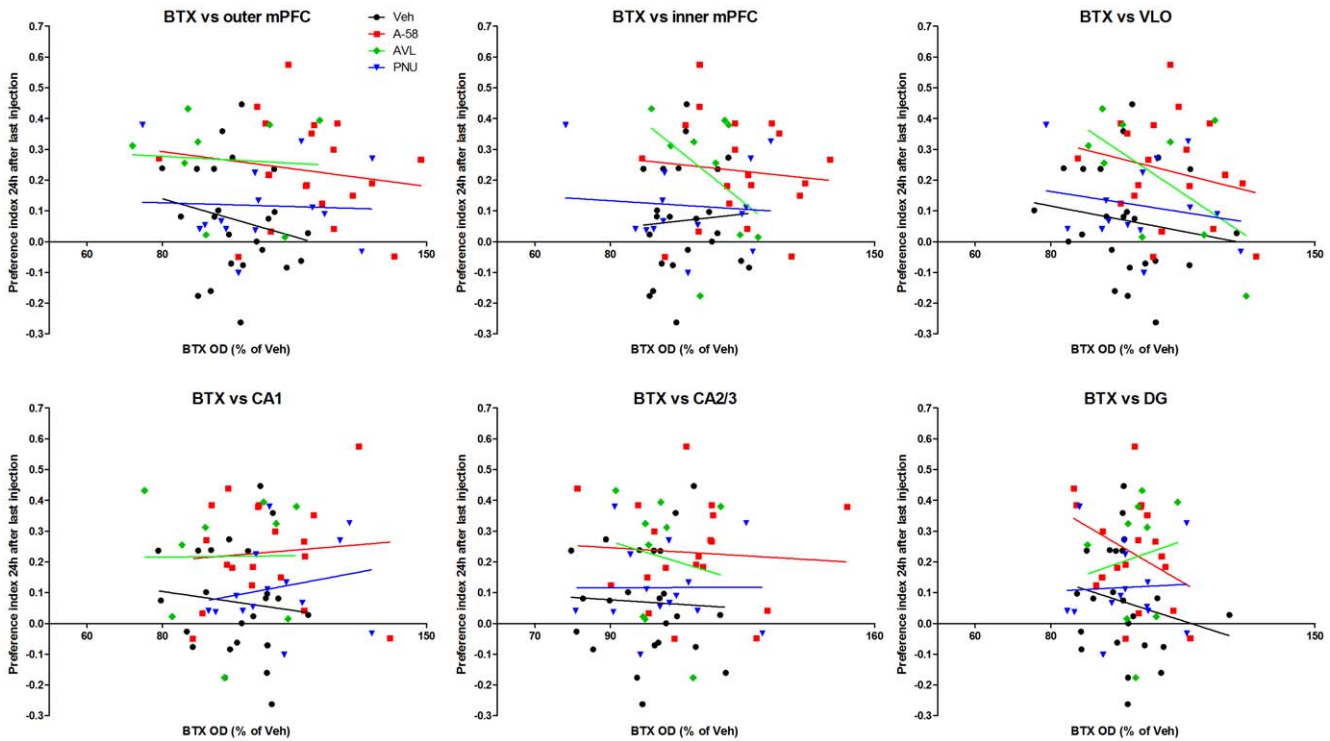

**Figure 3. Correlation between performance in the social discrimination test and brain [<sup>125</sup>I]-bungarotoxin binding.** The performance of rats in the social discrimination test 24 hours after the last of seven drug administrations, as described in Figure 1, was correlated with brain [<sup>125</sup>I]-bungarotoxin (BTX) binding, as described in Figure 2. Neither A-582941 (A-58, n = 19), PNU-120596 (PNU, n = 14), AVL-3288 (AVL, n = 8) or vehicle (Veh) treated rats displayed any significant correlations between performance in the social discrimination index and [<sup>125</sup>I]-BTX binding in any region measured. Correlation was determined as a slope that was significantly different from zero in a linear regression performed separately for each group in each region. doi:10.1371/journal.pone.0027014.g003

168 hours after the last administration. Vehicle-treated animals were decapitated after 1 hour (n = 6) or 7 days (n = 5), and since there was no difference in gene expression between the two groups (Student's t-test, data not shown), they were pooled. Tissue from the frontal cortex and hippocampus was dissected and analyzed using real-time qPCR.

A-582941 significantly increased RIC-3 mRNA expression in the frontal cortex 3 days after the last administration (Fig. 5). A-582941 did not significantly affect lynx1, lynx2, prostate stem cell antigen (PSCA), or Ly6H expression in the frontal cortex or hippocampus at any time point. However, there was a trend towards an increase in PSCA expression in the hippocampus

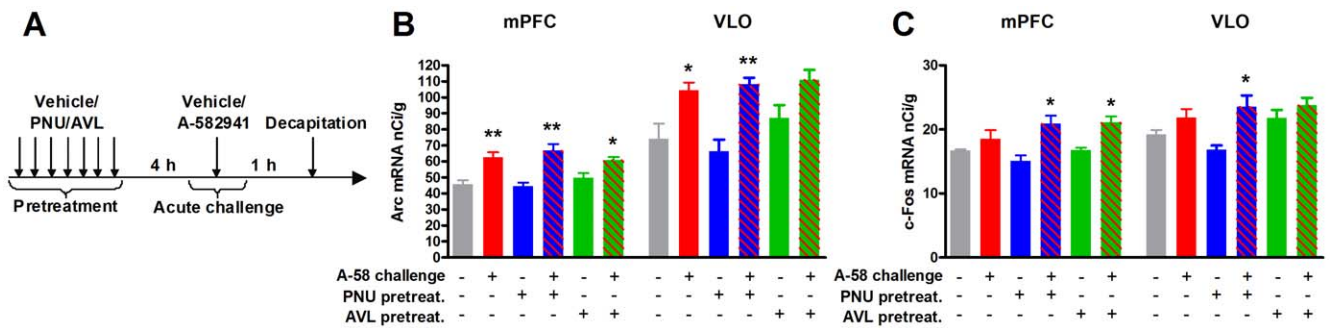

**Figure 4. Repeated administration of PNU-120596 or AVL-3288 does not affect A-582941-induced Arc and c-Fos mRNA expression in the frontal cortex.** Juvenile rats were administered PNU-120596 (PNU, 3 mg/kg), AVL-3288 (AVL, 1 mg/kg), or vehicle (5% DMSO, 8% Solutol in saline) once daily for 7 days. 4 hours after the last injection, the animals received an acute challenge of A-582941 (A-58, 10 mg/kg) or saline, and were decapitated 1 hour later. (A) A diagram of the experimental setup. Arc (B) and c-Fos (C) mRNA expression was analyzed using radioactive *in situ* hybridization in the medial prefrontal cortex (mPFC, layer II–VI) and the ventrolateral orbitofrontal cortex (VLO). A two-way ANOVA on Arc or c-Fos mRNA expression with repeated and acute treatment as the fixed factors showed a significant main effect of A-58-administration, but no interaction. Subsequent Bonferroni-corrected t-tests showed that the challenge with A-58 increased Arc mRNA in all groups except in the AVL-pretreated group in the VLO. Concerning c-Fos, there was only a significant effect of A-58 only in the PNU- and AVL-pretreated groups in the mPFC and only in the PNU-pretreated group in the VLO. N = 6. \*  $P < 0.05$  and \*\*  $P < 0.01$  indicate significant difference from respective vehicle controls in a Bonferroni-corrected t-test performed separately for each region. Error bars indicate the standard error of the mean. doi:10.1371/journal.pone.0027014.g004

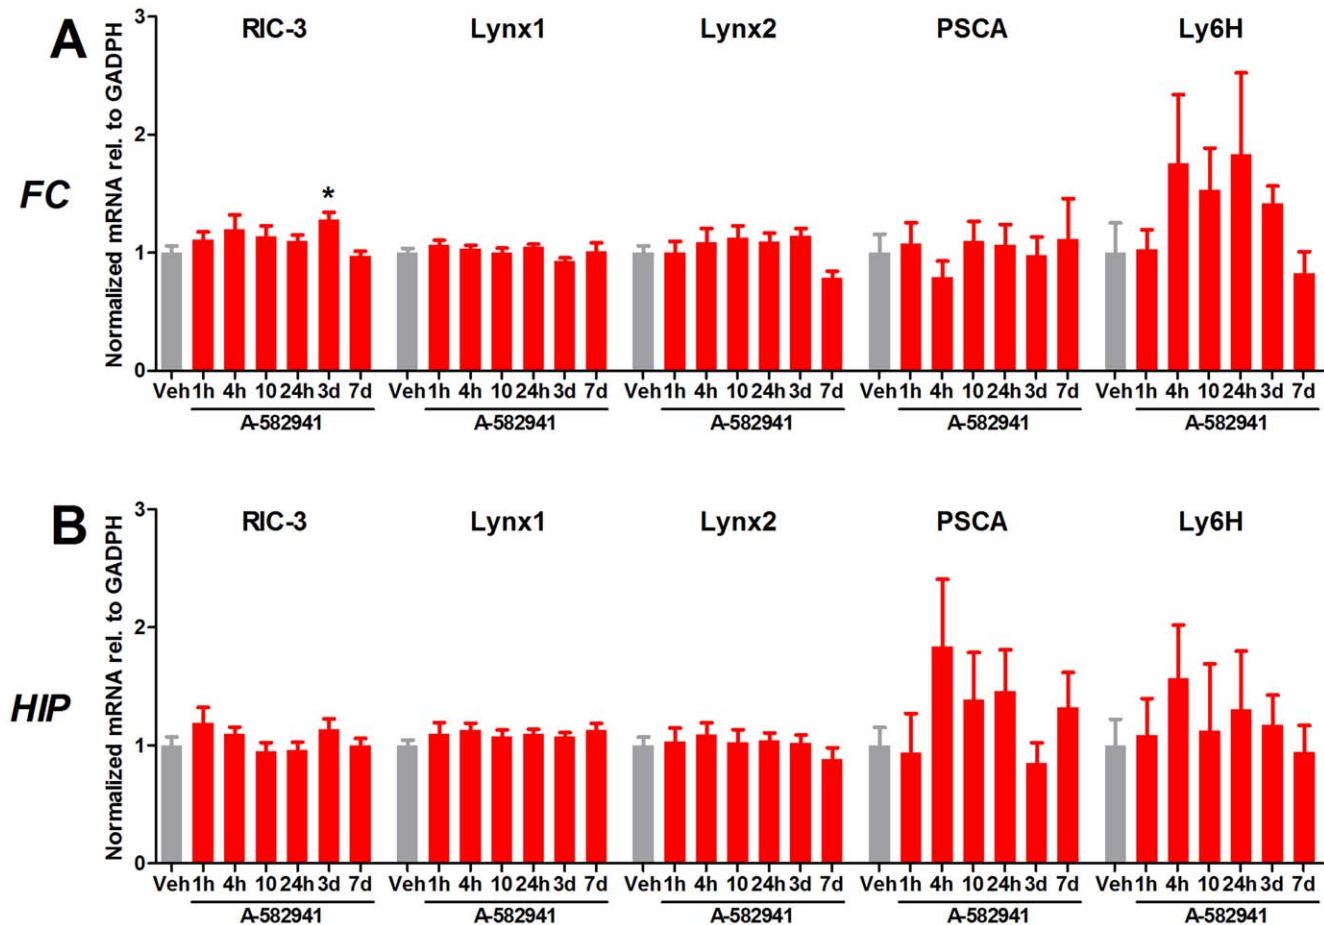

**Figure 5. Effect of repeated A-582941 administration on expression of endogenous regulators of  $\alpha 7$  nAChR function in the frontal cortex and hippocampus.** Juvenile rats were administered A-582941 (10 mg/kg) or vehicle once daily for 7 days and were decapitated at the stated time after the last administration. Tissue from the frontal cortex (FC) and hippocampus (HIP) was dissected and analyzed using real-time qPCR. Vehicle-treated animals were decapitated after 1 hour ( $n=6$ ) or 7 days ( $n=5$ ), and since there was no difference between the two groups (Student's *t*-test), they were pooled. A-582941 significantly increased RIC-3 mRNA expression in the frontal cortex 3 days after the last administration. A-582941 did not significantly affect lynx1, lynx2, PSCA, or Ly6H expression in the frontal cortex or hippocampus at any time point.  $N=6$  (11 for vehicle). \*  $P<0.05$ , \*\*  $P<0.01$ , and \*\*\*  $P<0.001$  indicate significant difference from vehicle controls in a one-way ANOVA with Dunnett's multiple comparison test performed separately for each region. Error bars indicate the standard error of the mean. doi:10.1371/journal.pone.0027014.g005

and in Ly6H expression in both the frontal cortex and hippocampus.

## Discussion

The main findings in this study are that the memory-enhancing effect of the  $\alpha 7$  nAChR agonist A-582941 in the social discrimination test is increased with repeated administration, and that repeated administration produces a sustained memory-enhancement. Furthermore, we demonstrate that the type I PAM, AVL-3288, also exhibits sustained memory-enhancing effects, whereas the type II PAM, PNU-120596, does not.

Repeated administration of A-582941 significantly enhanced short-term memory performance in the social discrimination test, whereas we did not observe an effect of a single administration of the compound. This finding is in accordance with a study showing that repeated, but not acute, administration of the  $\alpha 7$  nAChR agonist TC-5619 improves performance in the novel object recognition test [14]. Similarly, 14 daily doses, but not one acute dose, of the  $\alpha 7$  nAChR agonist SSR180711 mitigates a PCP-induced impairment in the novel object recognition test [27].

These results illustrate that analysis of the acute effects of  $\alpha 7$  nAChR agonists does not reveal their full range of effect, and that the enhancement of effect is not restricted to the social domain. It should be noted that acute effects of A-582941 have been demonstrated in a social recognition test, similar to the test used here [11]. This difference may arise because we use higher doses than in the previous study used, or because our version of the test might be less sensitive to the effects of  $\alpha 7$  nAChR agonists.

Neither single nor repeated administration of the  $\alpha 7$  nAChR PAMs PNU-120596 nor AVL-3288 produced immediate effects on social discrimination. This demonstrates a fundamental difference between PAMs and agonists of the  $\alpha 7$  nAChR in relation to the cognitive effects of repeated administration.

We further demonstrated that the pro-cognitive effect of repeated administration of A-582941 was sustained 24 hours after the last administration, whereas there was no effect 24 hours after a single administration. This suggests that neural changes occur with repeated administration that are not seen after a single exposure. Very low doses of the  $\alpha 7$  nAChR agonist AZD0328 have been shown to enhance novel object recognition in mice 4–48 hours after a single administration [18]. Although exposure to

ultra-low doses of  $\alpha 7$  nAChR agonists have been speculated to confer particular effects [18,19], this may indicate that our results are not due to a qualitative difference between the effects of a single and repeated administration, in terms of a prolonged effect, but rather an enhancement of a weak initial effect that is not picked up in the social discrimination test.

Despite the lack of an immediate effect, AVL-3288 enhanced short-term memory in the social discrimination test 24 hours after the last of seven injections. Contrarily, the type II PAM PNU-120596 had no long-term effect on social discrimination. This points towards a potential behavioral difference between type I and II  $\alpha 7$  nAChR PAMs. Future studies are required to determine whether such long-term effects are unique to AVL-3288 or a general feature of type I  $\alpha 7$  nAChR PAMs.

Several possible mechanisms may underlie the increased and sustained cognitive effects seen with repeated administration of A-582941 and AVL-3288, including a lowering of the threshold for LTP induction, increased nerve growth factor expression, IEG induction, and nAChR upregulation [15]. In line with this, we have previously demonstrated an increased amount of  $\alpha 7$  nAChRs as well as an increased IEG response to a subsequent challenge with an  $\alpha 7$  nAChR agonist after repeated administration with A-582941 in juvenile rats [26]. Contrarily, we show here that the IEG response to a challenge with an  $\alpha 7$  nAChR agonist was not significantly altered in AVL-3288- or PNU-120596-pretreated animals. This lends credence to the idea that the immediate enhancement of the pro-cognitive effect of A-582941 with repeated treatment may be due to an enhanced responsiveness to  $\alpha 7$  nAChR agonists at the cellular level, as reflected in an increased IEG response. This, however, does not explain the sustained effects on cognition seen with A-582941 and AVL-3288. The enhanced cellular responsiveness could be caused by an increase in  $\alpha 7$  nAChR levels. An alternative explanation for the enhanced effect is that A-582941 may initially desensitize  $\alpha 7$  nAChRs, thus obscuring an acute effect. This effect may be lessened with repeated administration, leading to the observed enhancement of short-term memory.

We further show that repeated administration of A-582941 increases BTX binding, as a measure of  $\alpha 7$  nAChR levels, in adult rats. Contrarily, neither AVL-3288 nor PNU-120596 produced widespread increases in BTX binding, although PNU-120596 did significantly increase BTX binding in the CA1 region of the hippocampus. Importantly, there was no direct correlation between short-term memory 24 hours after the last of seven daily doses and BTX binding in the frontal cortex or hippocampus for any group of animals. Therefore, the sustained cognitive enhancement observed with A-582941 and AVL-3288, and previously demonstrated with other  $\alpha 7$  nAChR agonists [16,18,19], is not likely due to an increase in receptor levels *per se*. There is also no correlation between short-term memory and BTX levels in vehicle-treated rats, suggesting that  $\alpha 7$  nAChR levels are not the major determinant of performance in the social discrimination test.

It has been shown that  $\alpha 7$  nAChR knockout mice display reduced attentional performance particularly with increased attentional load [28,29], suggesting that the  $\alpha 7$  nAChR is more important in situations of high attentional demand. It is therefore possible that a more demanding task might reveal a direct correlation between  $\alpha 7$  nAChR levels and cognitive performance. Notably, [ $^{125}$ I]-BTX autoradiography measures  $\alpha 7$  nAChRs located both internally and at the cell surface. Therefore, we cannot exclude a possible correlation between surface receptors and performance. In addition, binding experiments, such as with BTX, favour conversion of receptors to a desensitized state, which

has a higher affinity for ligand binding [30]. Therefore, BTX binding does not necessarily give an accurate measure of the pool of responsive receptors.

The lack of a widespread effect of AVL-3288 and PNU-120596 on BTX binding corresponds with our previous data showing a lack of effect of the PAMs PNU-120596 and NS1738 on BTX binding in non-performing juvenile rats [26], and suggests that the lack of effect of the PAMs is not due to a low cholinergic tone in non-performing animals, since the cholinergic tone would be expected to be much higher in animals that have undergone the social discrimination test [31].

A number of proteins have been described, which regulate the expression or function of nAChRs. These include RIC-3, which increases expression of  $\alpha 7$  nAChRs [32,33], and the lynx-like proteins lynx1, lynx2, PSCA, and Ly6H, which regulate the ion channel function of nAChRs, possibly by acting as allosteric modulators [34,35]. We did not find a significant change in lynx1, lynx2, PSCA, or Ly6H mRNA expression in the frontal cortex or hippocampus of juvenile rats repeatedly administered A-582941, although there was a trend towards increased Ly6H expression in both the frontal cortex and hippocampus that matched the time-course of  $\alpha 7$  nAChR upregulation, which has previously been assessed in the same animals [26]. However, Ly6H has been demonstrated not to bind to the  $\alpha 7$  nAChR [36]. We did find a significant upregulation of RIC-3 mRNA in the frontal cortex 3 days after the final administration. However, the time course for upregulation of RIC-3 does not match that of  $\alpha 7$  nAChR BTX binding sites, which peak after 4 hours [26]. It is therefore not likely that upregulation of RIC-3 is responsible for agonist-induced upregulation of the  $\alpha 7$  nAChR.

Taken together, these results suggest that the immediate procognitive effects of an  $\alpha 7$  nAChR agonist are enhanced with repeated administration, possibly due to increased responsiveness at the cellular level, as reflected in an increased immediate-early gene response [26]. Furthermore, we demonstrate that both  $\alpha 7$  nAChR agonists and type I PAMs may produce long-term improvement of cognition, and that this does not correlate with changes in  $\alpha 7$  nAChR levels *per se* or that of known regulators of nAChR function.

## Materials and Methods

### Animals

A total of 154 Adult (172–300 g at the end of experiments), 84 juvenile (36 days, 100–140 g at the end of experiments) and 32 young juvenile (25–28 days, 52–88 g) male Wistar rats were purchased from Taconic Europe (L. Skensved, Denmark). The animals were acclimatized under standardized conditions with free access to food and water for a minimum of 5 days after arrival. Young juvenile rats were housed separately to avoid transfer of odors between animals. All experiments were conducted in accordance with the Declaration of Helsinki, the Danish National Guide for Care and Use of Laboratory animals and the European Communities Council Directive of 24 November 1986 (86/609/EEC).

### Drug treatment and tissue collection

A-582941 [11] and PNU-120596 [21] were synthesized at the Department of Medicinal Chemistry at NeuroSearch A/S. AVL-3288 (also known as XY4083 and CCMI) [22] was a kind gift from Kelvin W. Gee, University of California, Irvine. The compounds were injected s.c. at 2 ml/kg.

Four batches of adult rats (to a total of 154 rats) were tested in the social discrimination task. The rats were injected with vehicle

(5% DMSO, 8% Solutol in 0.9% saline), 1 mg/kg AVL-3288, or 3 mg/kg PNU-120596 once daily for 7 days and tested on day 1, 2, 7, and 8. All animals that completed the fourth test (81 rats) were decapitated immediately after the test and their brains assayed for [<sup>125</sup>I]-BTX binding.

36 juvenile rats were injected with vehicle (5% DMSO, 8% Solutol in 0.9% saline), 1 mg/kg AVL-3288, or 3 mg/kg PNU-120596 once daily for 7 days, and 4 hours after the last injection, they received an injection of vehicle or 10 mg/kg A-582941 and were decapitated 1 hour later.

48 juvenile rats were injected with vehicle (0.9% NaCl) or 10 mg/kg A-582941 once daily for 7 days and decapitated 1, 4, 10, 24 hours, 3, or 7 days after the last injection.

For all experiments, the brains were dissected and divided into two hemispheres. One hemisphere was frozen directly in powdered dry ice, whereas the prefrontal cortex and hippocampus were dissected from the other hemisphere before freezing.

### Social discrimination

The social discrimination test was modified from [37]. Briefly, an adult male Wistar rat was put into a clean standard rat cage (43×27×18 cm) with a small amount of bedding ≥60 min before the test. Immediately before testing, the cage was gently moved to a testing platform fitted with a video camera, the lid was removed, and a young juvenile (25–28 days) male rat was introduced into the cage. A transparent plastic plate was quickly placed on top of the cage, and the rats were recorded for 5 min (trial 1). After trial 1, the juvenile rat was removed, the lid replaced, and the cage moved back to its original place. Drug injections, were given immediately after trial 1. After an inter-trial interval of 120 min, a second trial was performed. Trial 2 was identical to trial 1, except that two juvenile rats were introduced – the same juvenile as in trial 1 (familiar), and a juvenile that the adult rat had never seen before (novel). The amount of time the adult rat spent exploring the juveniles in trial 1 and 2 was measured by an observer blind to the treatment of the rats. Social exploration was defined as including sniffing, licking, and chewing fur of the juvenile, as well as pawing and close following of the juvenile. Exploration initiated by the juveniles was not included. The exploration in trial 2 is presented as a preference index, which is the difference between the time spent interacting with the novel and familiar juvenile divided by the total interaction time. The young adult rats were used for multiple tests, but were never used for more than one test with the same adult rat.

### Autoradiography

Brain hemispheres were cut into 12 μm serial coronal sections on a cryostat and directly thaw-mounted onto super frost glass slides. Sections were collected in parallel series with 4–6 sections

per glass slide throughout the prefrontal cortex (6 series, 2.8–3.2 mm anterior to Bregma) and the dorsal hippocampal region (6 series, 3.6–4.0 mm posterior to Bregma) (Paxinos and Watson 1986). Two slides from each animal were thawed at room temperature for 30 min, followed by 30 min hydration in 50 mM Tris buffer, pH 7.3 (binding buffer). Slides were then incubated 2 hours in binding buffer containing 0.5 nM [<sup>125</sup>I]Tyr-54-monoiodo-α-bungarotoxin (2,200 Ci/mmol, Perkin Elmer, Skovlunde, Denmark) to assess total binding. For analysis of non-specific binding, 1 mM (–)-nicotine (Sigma-Aldrich, Brøndby, Denmark) was included in the incubation. Slides were then briefly washed in binding buffer, followed by 2×30 min washes in ice-cold binding buffer and rinsed briefly in ice-cold distilled water. Slides were then dried under an air stream and fixated overnight at 4°C in a sealed chamber containing paraformaldehyde vapor. Finally, slides were dried 2–3 hours in an excicator, exposed to a BAS-MS2040 phosphor imaging plate (Science Imaging Scandinavia AB, Nacka, Sweden) for ~4 hours and scanned with a BAS-2500 imaging plate scanner (Fujifilm Europe GmbH, Düsseldorf, Germany).

### Quantitative assessment of mRNA levels

Total RNA was isolated with Trizol Reagent (Sigma-Aldrich, Brøndby, Denmark) according to the manufacturer's directions. The samples were dissolved in RNase-free water and RNA content was quantified using a Nanodrop ND-1000 spectrophotometer (Nanodrop Technologies, Wilmington, DE). Extracted RNA was reverse transcribed into single-stranded cDNA with the ImProm-II™ reverse transcription kit (Promega, Madison, WI) according to the manufacturer's directions using oligo(dT)<sub>15</sub> primers, 6 mM MgCl<sub>2</sub>, and 20 units of RNase inhibitor.

Real-time qPCR reactions were performed in a total volume of 20 μl, containing 1 μl sample cDNA, 1× Brilliant II SYBR green mastermix (Stratagene, La Jolla, CA), and 15 pmol each of the forward and reverse primer (DNA technology, Aarhus, Denmark). PCR was performed on a Light Cycler 480 (Roche, Indianapolis, IN) with a 10 minute preincubation at 94°C followed by 40 cycles of 30 seconds at 94°C, 45 seconds at 60°C and 1.5 minutes at 72°C. All primers were validated by using serially diluted cDNA to establish a standard curve, and by confirming the size of the product on a DNA gel (data not shown). The primers used are described in Table 1. Quantification of mRNA expression was performed according to the comparative C<sub>T</sub> method as described in [38]. For each sample, the amount of target mRNA was normalized to that of the reference gene GAPDH.

### In situ hybridization

*In situ* hybridization was performed as previously described [26]. Two different synthetic oligonucleotide DNA probes (DNA

**Table 1.** Primers used for real-time qPCR.

| Gene  | Forward primer 5'-3'    | Reverse primer 5'-3'  | Product size |
|-------|-------------------------|-----------------------|--------------|
| RIC-3 | CAGCACTGATAACACACATGTGG | GCAGGCTGCTTCACTCAAAA  | 75 bp        |
| Lynx1 | ACCACTCGAACTTACTTACC    | ATCGTACACGGTCTCAAAGC  | 81 bp        |
| Lynx2 | GTTCTGGCTTCCAGGGCTGG    | GGCTGCTGACGATGCACACG  | 191 bp       |
| PSCA  | GCCTACCAGTTCTGATCAG     | TCACCCCACCTAGCTTCAT   | 154 bp       |
| Ly6H  | CTACTGGCCTTCTTCTCTG     | AATGATCCTTCTGCTGCTG   | 163 bp       |
| GAPDH | CATCAAGAAGGTGGTGAAGCA   | CTGTTGAAGTCACAGGAGACA | 93 bp        |

doi:10.1371/journal.pone.0027014.t001

Technology, Aarhus, Denmark) complimentary to bases 789–839 of rat Arc cDNA [39] and bases 132–179 of rat c-Fos cDNA [40], respectively, were used.

### Quantification and data analysis

Mean optical densities from autoradiography and *in situ* hybridization were quantified in the regions of interest using a computer image analysis system (Quantity One®, Bio-Rad, CA) by an observer blinded to the treatment of the animals. The individual value for each region was calculated as the average measurement from three individual sections. For autoradiography, the average value from an adjacent slice with non-specific binding was subtracted to yield specific binding. For *in situ* hybridization, background values were measured for each slide individually in a tissue-free area and subtracted from each measurement on that slide. The presented values are the measured value minus the background/non-specific measurement, normalized to the level of the respective vehicle group.

Data were analyzed using two-way ANOVA, one-way ANOVA followed by Dunnett's Multiple Comparison test, or Bonferroni-

corrected t-tests as appropriate. Linear regression was used to correlate [<sup>125</sup>I]-BTX binding with performance in the social discrimination test. The statistical calculations were performed using GraphPad Prism version 5.03 for Windows (GraphPad Software, San Diego, USA). All data are presented as mean ± standard error of the mean, and a *P*-value of less than 0.05 was considered statistically significant.

### Acknowledgments

The authors would like to thank Dr. Kelvin W. Gee, University of California, Irvine, and Dr. Dan Peters, NeuroSearch A/S, for donating α7 nAChR ligands.

### Author Contributions

Conceived and designed the experiments: MST JDM. Performed the experiments: MST MES. Analyzed the data: MST MES. Wrote the paper: MST JDM MES.

### References

- Haydar SN, Dunlop J (2010) Neuronal nicotinic acetylcholine receptors - targets for the development of drugs to treat cognitive impairment associated with schizophrenia and Alzheimer's disease. *Curr Top Med Chem* 10: 144–52.
- Faghil R, Gopalakrishnan M, Briggs CA (2008) Allosteric modulators of the alpha7 nicotinic acetylcholine receptor. *J Med Chem* 51: 701–12.
- Bertrand D, Devillers-Thiéry A, Revah F, Galzi JL, Hussy N, et al. (1992) Unconventional pharmacology of a neuronal nicotinic receptor mutated in the channel domain. *Proc Natl Acad Sci U S A* 89: 1261–5.
- Dani JA, Radcliffe KA, Pidoplichko VI (2000) Variations in desensitization of nicotinic acetylcholine receptors from hippocampus and midbrain dopamine areas. *Eur J Pharmacol* 393: 31–8.
- Deutsch SI, Schwartz BL, Schooler NR, Rosse RB, Mastroianni J, et al. (2008) First administration of cytidine diphosphocholine and galantamine in schizophrenia: a sustained alpha7 nicotinic agonist strategy. *Clin Neuropharmacol* 31: 34–9.
- Papke RL, Kem WR, Soti F, López-Hernández GY, Horenstein NA (2009) Activation and desensitization of nicotinic alpha7-type acetylcholine receptors by benzylidene anabasines and nicotine. *J Pharmacol Exp Ther* 329: 791–807.
- Thomsen MS, Hansen HH, Timmermann DB, Mikkelsen JD (2010) Cognitive improvement by activation of alpha7 nicotinic acetylcholine receptors: from animal models to human pathophysiology. *Curr Pharm Des* 16: 323–43.
- Bjuggstad KB, Mahnir VM, Kem WR, Socci DJ, Arendash GW (1996) Long-term treatment with GTS-21 or nicotine enhances water maze performance in aged rats without affecting the density of nicotinic receptor subtypes in neocortex. *Drug Development Research* 39: 19–28.
- Stevens KE, Kem WR, Mahnir VM, Freedman R (1998) Selective alpha7-nicotinic agonists normalize inhibition of auditory response in DBA mice. *Psychopharmacology (Berl)* 136: 320–7.
- Levin ED, Bettgowda C, Blosser J, Gordon J (1999) AR-R17779, an alpha7 nicotinic agonist, improves learning and memory in rats. *Behav Pharmacol* 10: 675–80.
- Bitner RS, Bunnelle WH, Anderson DJ, Briggs CA, Buccafusco J, et al. (2007) Broad-spectrum efficacy across cognitive domains by alpha7 nicotinic acetylcholine receptor agonism correlates with activation of ERK1/2 and CREB phosphorylation pathways. *J Neurosci* 27: 10578–87.
- Pichat P, Bergis OE, Terranova J-P, Urani A, Duarte C, et al. (2007) SSR180711, a novel selective alpha7 nicotinic receptor partial agonist: (II) efficacy in experimental models predictive of activity against cognitive symptoms of schizophrenia. *Neuropsychopharmacology* 32: 17–34.
- Li J-G, Lehr M, Liu-Chen L-Y, Woodruff-Pak DS (2008) Nicotinic acetylcholine receptors and modulation of learning in 4- and 27-month-old rabbits. *Neuropsychopharmacology* 33: 2820–30.
- Hauser TA, Kucinski A, Jordan KG, Gatto GJ, Wersinger SR, et al. (2009) TC-5619: an alpha7 neuronal nicotinic receptor-selective agonist that demonstrates efficacy in animal models of the positive and negative symptoms and cognitive dysfunction of schizophrenia. *Biochem Pharmacol* 78: 803–12.
- Buccafusco JJ, Letchworth SR, Bencherif M, Lippello PM (2005) Long-lasting cognitive improvement with nicotinic receptor agonists: mechanisms of pharmacokinetic-pharmacodynamic discordance. *Trends Pharmacol Sci* 26: 352–60.
- Briggs CA, Anderson DJ, Brioni JD, Buccafusco JJ, Buckley MJ, et al. (1997) Functional characterization of the novel neuronal nicotinic acetylcholine receptor ligand GTS-21 in vitro and in vivo. *Pharmacol Biochem Behav* 57: 231–41.
- Abdulla FA, Bradbury E, Calamini MR, Lippello PM, Wonnacott S, et al. (1996) Relationship between up-regulation of nicotinic binding sites in rat brain and delayed cognitive enhancement observed after chronic or acute nicotinic receptor stimulation. *Psychopharmacology (Berl)* 124: 323–31.
- Werkheiser JL, Sydserff S, Hubbs SJ, Ding M, Eisman MS, et al. (2011) Ultra-low exposure to alpha-7 nicotinic acetylcholine receptor partial agonists elicits an improvement in cognition that corresponds with an increase in alpha-7 receptor expression in rodents: implications for low dose clinical efficacy. *Neuroscience* 186: 76–87.
- Castner SA, Smagin GN, Piser TM, Wang Y, Smith JS, et al. (2011) Immediate and sustained improvements in working memory after selective stimulation of α7 nicotinic acetylcholine receptors. *Biol Psychiatry* 69: 12–8.
- Gronlien JH, Håkerud M, Ween H, Thorin-Hagene K, Briggs CA, et al. (2007) Distinct profiles of alpha7 nAChR positive allosteric modulation revealed by structurally diverse chemotypes. *Mol Pharmacol* 72: 715–24.
- Hurst RS, Hajós M, Raggenbass M, Wall TM, Higdon NR, et al. (2005) A novel positive allosteric modulator of the alpha7 neuronal nicotinic acetylcholine receptor: in vitro and in vivo characterization. *J Neurosci* 25: 4396–405.
- Ng HJ, Whittemore ER, Tran MB, Hogenkamp DJ, Broide RS, et al. (2007) Nootropic alpha7 nicotinic receptor allosteric modulator derived from GABAA receptor modulators. *Proc Natl Acad Sci U S A* 104: 8059–64.
- Timmermann DB, Gronlien JH, Kohlhaas KL, Nielsen EO, Dam E, et al. (2007) An allosteric modulator of the alpha7 nicotinic acetylcholine receptor possessing cognition-enhancing properties in vivo. *J Pharmacol Exp Ther* 323: 294–307.
- Dunlop J, Lock T, Jow B, Sitzia F, Grauer S, et al. (2009) Old and new pharmacology: positive allosteric modulation of the alpha7 nicotinic acetylcholine receptor by the 5-hydroxytryptamine(2B/C) receptor antagonist SB-206553 (3,5-dihydro-5-methyl-N-3-pyridinylbenzo[1,2-b:4,5-b']di pyrrole-1(2H)-carboxamide). *J Pharmacol Exp Ther* 328: 766–76.
- Dinklo T, Shaban H, Thuring JW, Lavreysen H, Stevens KE, et al. (2011) Characterization of 2-[[4-fluoro-3-(trifluoromethyl)phenyl]amino]-4-(4-pyridinyl)-5-thiazolemethanol (JNJ-1930942), a novel positive allosteric modulator of the {alpha}7 nicotinic acetylcholine receptor. *J Pharmacol Exp Ther* 336: 560–74.
- Christensen DZ, Mikkelsen JD, Hansen HH, Thomsen MS (2010) Repeated administration of alpha7 nicotinic acetylcholine receptor (nAChR) agonists, but not positive allosteric modulators, increases alpha7 nAChR levels in the brain. *J Neurochem* 114: 1205–16.
- Hashimoto K, Ishima T, Fujita Y, Matsuo M, Kobashi T, et al. (2008) Phencyclidine-induced cognitive deficits in mice are improved by subsequent subchronic administration of the novel selective alpha7 nicotinic receptor agonist SSR180711. *Biol Psychiatry* 63: 92–7.
- Keller JJ, Keller AB, Bowers BJ, Wehner JM (2005) Performance of alpha7 nicotinic receptor null mutants is impaired in appetitive learning measured in a signaled nose poke task. *Behav Brain Res* 162: 143–52.
- Young JW, Crawford N, Kelly JS, Kerr LE, Marston HM, et al. (2007) Impaired attention is central to the cognitive deficits observed in alpha 7 deficient mice. *Eur Neuropsychopharmacol* 17: 145–55.
- Reymond J-L, van Deursen R, Bertrand D (2011) What we have learned from crystal structures of proteins to receptor function. *Biochem Pharmacol*: In press.
- Pepeu G, Giovannini MG (2004) Changes in acetylcholine extracellular levels during cognitive processes. *Learn Mem* 11: 21–7.



32. Millar NS (2008) RIC-3: a nicotinic acetylcholine receptor chaperone. *Br J Pharmacol* 153 Suppl: S177–83.
33. Treinin M (2008) RIC-3 and nicotinic acetylcholine receptors: biogenesis, properties, and diversity. *Biotechnol J* 3: 1539–47.
34. Miwa JM, Freedman R, Lester HA (2011) Neural systems governed by nicotinic acetylcholine receptors: emerging hypotheses. *Neuron* 70: 20–33.
35. Thomsen MS, Mikkelsen JD (2011) The  $\alpha 7$  nicotinic acetylcholine receptor complex: one, two or multiple drug targets? *Curr Drug Targets*: in press.
36. Tekinay AB, Nong Y, Miwa JM, Lieberam I, Ibanez-Tallon I, et al. (2009) A role for LYNX2 in anxiety-related behavior. *Proc Natl Acad Sci U S A* 106: 4477–82.
37. Engelmann M, Wotjak CT, Landgraf R (1995) Social discrimination procedure: an alternative method to investigate juvenile recognition abilities in rats. *Physiol Behav* 58: 315–21.
38. Schmittgen TD, Livak KJ (2008) Analyzing real-time PCR data by the comparative CT method. *Nature Protocols* 3: 1101–1108.
39. Pei Q (2003) Antidepressant drug treatment induces Arc gene expression in the rat brain. *Neuroscience* 121: 975–982.
40. Woldbye DP, Greisen MH, Bolwig TG, Larsen PJ, Mikkelsen JD (1996) Prolonged induction of c-fos in neuropeptide Y- and somatostatin-immunoreactive neurons of the rat dentate gyrus after electroconvulsive stimulation. *Brain Res* 720: 111–9.
